# Supplementary material
Source: publisher figshare collection journal article supplement (https://tandf.figshare.com/articles/dataset/_/1378856)
Supplement: Supplementary file 1 [file 3]

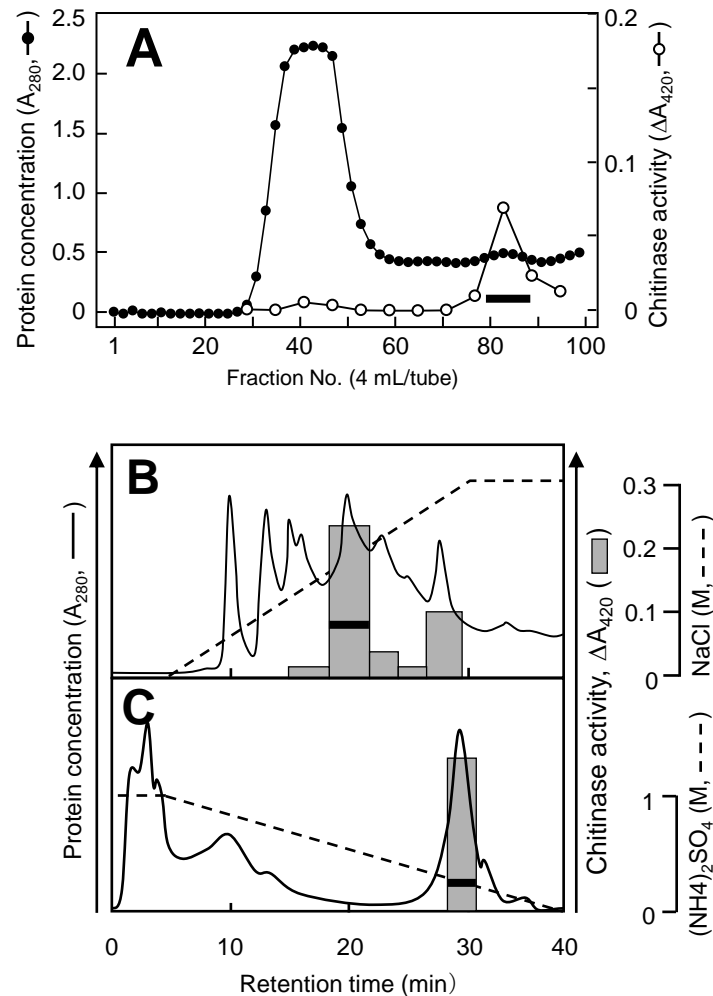

**Supplementary Fig. 1.** Column chromatograms of chitinase active fraction from vegetative stems of *E. arvense*. **A**, The chitinase fraction obtained by butyl-Toyopearl 650M column chromatography was applied to gel filtration on a Sephadex G-75 column ( $2 \times 140$  cm) previously washed with 10 mM sodium acetate buffer, pH 5.0, and developed using the same buffer. **B**, The chitinase fraction obtained by gel filtration on a Sephadex G-75 column was applied to a Mono-Q column ( $0.5 \times 5$  cm) equilibrated with 10 mM sodium acetate buffer, pH 5.0. Elution was done with a linear gradient of NaCl from 0 to 0.3 M in the same buffer. **C**, The chitinase fraction obtained by Mono-Q column chromatography was applied to a Phenyl Superose column ( $0.5 \times 5$  cm) equilibrated with 1 M ammonium sulfate in 10 mM sodium acetate buffer, pH 5.0. The elution was done with a linear gradient of ammonium sulfate from 1 to 0 M in the same buffer. The major active fraction was collected as EaChiA. Bold underlines indicate collected fraction.
